# Supplementary material
Source: PubMed Central journal article supplement (PMC4560906)

## Web Appendix: Technical details

### Overview

We estimate the cumulative mortality risk under the observed treatment history (i.e., the “no intervention”) and each of the dynamic treatment plans using a Monte Carlo simulation of 50,000 patients sampled from the study sample randomly with replacement at baseline. The densities of covariates measured at baseline were estimated using their empirical distributions in the sampled data, and the densities of time-varying covariates were modeled using parametric regression models in the observed data. The values of these covariates under each dynamic treatment plan were imputed using a draw from a density estimated by the regression models after assigning treatment according to the designated treatment plan in the Monte Carlo sample. The probability of mortality was estimated for each patient in each person-month using a parametric regression model with treatment assignment and covariate history set to what it would have been under the given dynamic treatment plan.

### Details

Let patients be indexed from  $i = 1, \dots, 3532$ ,  $A$  represent treatment,  $\mathbf{Z}$  represent a vector of covariates including CD4 cell count, viral load, and baseline covariates,  $C$  represent censoring, and  $Y$  represent death. Adapting the notation of Young<sup>5</sup>, we write the cumulative incidence at time  $k + 1$  under dynamic treatment regime  $g$  using the  $g$ -formula:

Equation 1:

$$P(Y_{k+1}^g = 1) = \sum_{z_k} \sum_{j=0}^k P[Y_{j+1} = 1 | Z_j = z_j, \bar{A}_j = \bar{a}_j, Y_j = C_{j+1} = 0] \times \prod_{s=0}^j P(Y_s = 0 | Z_{s-1} = z_{s-1}, \bar{A}_{s-1} = \bar{a}_{s-1}, Y_{s-1} = C_s = 0) \times f(z_s | z_{s-1}, \bar{a}_{s-1}, Y_{s-1} = C_s = 0) \times P^g(A_s | z_s, a_{s-1}, Y_{s-1} = C_s = 0)$$

To estimate the cumulative incidence under regime  $g$  from the observed data, we follow the steps below:

1. Fit parametric models for component of the density in the observed data.
  - a. Fit a logistic model to estimate whether patient  $i$  has a detectable viral load at time  $s$ .

$$\begin{aligned} \text{logit}[P(dvl_{i,s} = 1)] &= \\ &= \alpha_0 + \boldsymbol{\alpha}_1 \mathbf{L}_i^T + \alpha_2 dvl_{i,s-1} + \alpha_3 g(vl_{i,s-1}) + \alpha_4 g(cd4_{i,s-1}) \\ &\quad + \alpha_5 A + \alpha_6 A \times g(\text{age group}) + \alpha_7 g(s) \end{aligned}$$

Where  $\mathbf{L}$  is a vector of time-fixed covariates, including sex, race, ethnicity, injection drug use, MSM status, age at baseline, year of study entry, CD4 at study entry, viral load at study entry, the product of year and age at study entry.

- b. Fit linear regression models to estimate viral load at time  $s$  among patients who had a detectable viral load at time  $s$ .

$$\begin{aligned} VL_{i,s} &= \alpha_0 + \boldsymbol{\alpha}_1 \mathbf{L}_i^T + \alpha_2 dvl_{i,s-1} + \alpha_3 g(vl_{i,s-1}) + \alpha_4 g(cd4_{i,s-1}) \\ &\quad + \alpha_5 A + \alpha_6 A \times g(\text{age group}) + \alpha_7 g(s) + \epsilon_i, \quad \epsilon_i \sim N(0, \sigma) \end{aligned}$$

- c. Fit linear regression models to estimate CD4 cell count at time  $s$  stratified by treatment at time  $s - 1$ :

$$\begin{aligned} CD4_{i,s} &= \alpha_0 + \boldsymbol{\alpha}_1 \mathbf{L}_i^T + \alpha_2 dvl_{i,s-1} + \alpha_3 dvl_{i,s} + \alpha_4 g(vl_{i,s}) + \alpha_5 g(vl_{i,s-1}) \\ &\quad + \alpha_6 g(cd4_{i,s-1}) + \alpha_7 g(s) + \alpha_8 g(\text{age group}_i) + \epsilon_i, \quad \epsilon_i \sim N(0, \sigma) \end{aligned}$$

- d. Fit a logistic regression model to estimate the probability of being treated at time  $s$ .

$$\begin{aligned} \text{logit}[P(A_{i,s} = 1)] &= \\ &= \alpha_0 + \boldsymbol{\alpha}_1 \mathbf{L}_i^T + \alpha_2 dvl_{i,s} + \alpha_3 dvl_{i,s-1} + \alpha_4 g(vl_{i,s}) \\ &\quad + \alpha_5 g(cd4_{i,s}) + \alpha_8 g(s) \end{aligned}$$

- e. Fit a logistic regression model to estimate the probability of death at time  $s$ .

$$\begin{aligned} \text{logit}[P(Y_{i,s} = 1)] \\ = \alpha_0 + \alpha_1 L_i^T + \alpha_2 dvl_{i,s} + \alpha_3 dvl_{i,s-1} + \alpha_4 g(vl_{i,s}) \\ + \alpha_5 g(cd4_{i,s}) + \alpha_6 A + \alpha_7 A \times g(\text{age group}) + \alpha_8 g(s) \end{aligned}$$

In all models, continuous variables were modeled using restricted quadratic splines<sup>18</sup>, and categorical variables were modeled using indicator variables. Age groups were defined as in the main text (18 – 34, 35 – 44, 45 – 60). Point estimates were nearly identical when models a through e were stratified by age group rather than merely including interaction terms between age group and treatment.

2. Draw a large ( $N = 50,000$ ) Monte Carlo sample from the observed patients at baseline with replacement.
3. In the Monte Carlo sample, estimate the cumulative incidence under no intervention (as a check on the fit of the parametric models) and each dynamic treatment plan using the g-formula provided in equation 1.
  - a. The distribution of  $L$  in the large Monte Carlo sample approximates the distribution of  $L$  in the observed data.
  - b. Estimate CD4 cell count, whether or not viral load is detectable, and viral load for participant  $i$  at time  $s$  using the coefficients from models a through c above.
  - c. Set treatment according to the treatment regime of interest. The value of  $A_{i,s}$  drawn from a Bernoulli distribution with probability given below. Specifically, if  $x$  represents the CD4 cell count threshold for treatment initiation,

$$P^g(A_{i,s} = 1) = \begin{cases} 0 & CD4_{i,s} > x \\ \text{expit}(\alpha_0 + \alpha_1 L_i^T + \alpha_2 dvl_{i,s} + \alpha_3 dvl_{i,s-1} + \alpha_4 g(vl_{i,s}) + \alpha_5 g(cd4_{i,s}) + \alpha_8 g(s)) & CD4_{i,s} < x, m < 6 \\ 1 & (CD4_{i,s} < x, m \geq 6) \text{ or } A_{i,s-1} = 1 \end{cases}$$

Where  $m$  is the number of months that CD4 cell count has been below  $x$ .

- d. Set  $P(C = 0) = 1 \forall i, s$
4. Perform steps 1 through 4 in 500 bootstrap samples. The standard deviation of the 500 estimates can be used as the standard error of the point estimate.

Supplementary Table 1: 10-year cumulative incidence of mortality under no intervention and 7 dynamic treatment plans with a 6 month grace period among 3532 patients who entered care at between January 1, 1998 and December 31, 2013 at 8 US clinical sites, followed for death up to 10 years

| Treatment plan  | Mortality | Risk ratio | Risk difference |
|-----------------|-----------|------------|-----------------|
| No intervention | 12.60     |            |                 |
| 500             | 10.80     | 1          | 0               |
| 450             | 10.81     | 1.00       | 0.02            |
| 400             | 11.25     | 1.04       | 0.45            |
| 350             | 11.66     | 1.08       | 0.87            |
| 300             | 11.93     | 1.11       | 1.14            |
| 250             | 12.70     | 1.18       | 1.90            |
| 200             | 13.51     | 1.25       | 2.71            |
| 18 to 34        |           |            |                 |
| 500             | 6.11      | 1          | 0               |
| 450             | 5.77      | 0.95       | -0.34           |
| 400             | 6.12      | 1.00       | 0.01            |
| 350             | 6.08      | 1.00       | -0.03           |
| 300             | 6.34      | 1.04       | 0.23            |
| 250             | 6.69      | 1.10       | 0.58            |
| 200             | 6.25      | 1.02       | 0.14            |
| 35 to 45        |           |            |                 |
| 500             | 11.43     | 1          | 0               |
| 450             | 11.94     | 1.04       | 0.51            |
| 400             | 11.95     | 1.05       | 0.52            |
| 350             | 12.42     | 1.09       | 0.99            |
| 300             | 12.14     | 1.06       | 0.71            |
| 250             | 12.94     | 1.13       | 1.50            |
| 200             | 13.59     | 1.19       | 2.15            |
| 45 to 65        |           |            |                 |
| 500             | 19.29     | 1          | 0               |
| 450             | 18.89     | 0.98       | -0.40           |
| 400             | 20.06     | 1.04       | 0.77            |
| 350             | 21.60     | 1.12       | 2.30            |
| 300             | 22.84     | 1.18       | 3.54            |
| 250             | 24.33     | 1.26       | 5.04            |
| 200             | 28.07     | 1.45       | 8.78            |

Supplementary Table 2: 10-year cumulative incidence of mortality under no intervention and 7 dynamic treatment plans with no grace period among 3532 patients who entered care at between January 1, 1998 and December 31, 2013 at 8 US clinical sites, followed for death up to 10 years

| Treatment plan  | Mortality | Risk ratio | Risk difference |
|-----------------|-----------|------------|-----------------|
| No intervention | 12.60     |            |                 |
| 500             | 10.34     | 1          | 0               |
| 450             | 10.49     | 1.02       | 0.16            |
| 400             | 10.65     | 1.03       | 0.31            |
| 350             | 11.12     | 1.08       | 0.78            |
| 300             | 11.28     | 1.09       | 0.95            |
| 250             | 11.69     | 1.13       | 1.35            |
| 200             | 12.50     | 1.21       | 2.16            |
| 18 to 34        |           |            |                 |
| 500             | 5.65      | 1          | 0               |
| 450             | 5.91      | 1.05       | 0.26            |
| 400             | 5.73      | 1.01       | 0.08            |
| 350             | 5.85      | 1.04       | 0.20            |
| 300             | 5.72      | 1.01       | 0.07            |
| 250             | 6.02      | 1.06       | 0.36            |
| 200             | 6.19      | 1.10       | 0.54            |
| 35 to 45        |           |            |                 |
| 500             | 11.47     | 1          | 0               |
| 450             | 11.33     | 0.99       | -0.14           |
| 400             | 10.94     | 0.95       | -0.52           |
| 350             | 11.87     | 1.04       | 0.41            |
| 300             | 11.73     | 1.02       | 0.27            |
| 250             | 11.78     | 1.03       | 0.32            |
| 200             | 12.85     | 1.12       | 1.38            |
| 45 to 65        |           |            |                 |
| 500             | 17.75     | 1          | 0               |
| 450             | 18.06     | 1.02       | 0.31            |
| 400             | 19.98     | 1.13       | 2.23            |
| 350             | 20.28     | 1.14       | 2.53            |
| 300             | 21.71     | 1.22       | 3.96            |
| 250             | 22.89     | 1.29       | 5.14            |
| 200             | 24.72     | 1.39       | 6.97            |

Supplemental table 3. Standardized 10-year cumulative incidence of mortality under no intervention and 3 dynamic treatment plans with a 6-month grace period among 3372 patients who entered care at between January 1, 1998 and December 31, 2013 at 8 US clinical sites *with no prior AIDS diagnosis*, followed for death up to 10 years

| Treatment plan            | Mortality | Risk ratio | Risk difference |
|---------------------------|-----------|------------|-----------------|
| No intervention           | 12.47     |            |                 |
| All ages                  |           |            |                 |
| 500 cells/mm <sup>3</sup> | 10.10     | 1          | 0               |
| 350 cells/mm <sup>3</sup> | 11.33     | 1.12       | 1.23            |
| 200 cells/mm <sup>3</sup> | 13.45     | 1.33       | 3.35            |
| 18 to 34                  |           |            |                 |
| 500 cells/mm <sup>3</sup> | 5.52      | 1          | 0               |
| 350 cells/mm <sup>3</sup> | 5.76      | 1.04       | 0.24            |
| 200 cells/mm <sup>3</sup> | 6.49      | 1.18       | 0.98            |
| 35 to 45                  |           |            |                 |
| 500 cells/mm <sup>3</sup> | 10.86     | 1          | 0               |
| 350 cells/mm <sup>3</sup> | 12.13     | 1.12       | 1.27            |
| 200 cells/mm <sup>3</sup> | 13.94     | 1.28       | 3.09            |
| 45 to 65                  |           |            |                 |
| 500 cells/mm <sup>3</sup> | 18.35     | 1          | 0               |
| 350 cells/mm <sup>3</sup> | 21.54     | 1.17       | 3.19            |
| 200 cells/mm <sup>3</sup> | 27.17     | 1.48       | 8.81            |

Supplemental table 4. Standardized 10-year cumulative incidence of mortality under no intervention and 3 dynamic treatment plans with a 6-month grace period among 3390 patients who entered care at between January 1, 1998 and December 31, 2013 at 8 US clinical sites *with no prior mono or dual therapy use*, followed for death up to 10 years

| Treatment plan            | Mortality | Risk ratio | Risk difference |
|---------------------------|-----------|------------|-----------------|
| No intervention           | 13.56     |            |                 |
| All ages                  |           |            |                 |
| 500 cells/mm <sup>3</sup> | 10.92     | 1          | 0               |
| 350 cells/mm <sup>3</sup> | 12.37     | 1.13       | 1.45            |
| 200 cells/mm <sup>3</sup> | 14.18     | 1.30       | 3.26            |
| 18 to 34                  |           |            |                 |
| 500 cells/mm <sup>3</sup> | 6.31      | 1          | 0               |
| 350 cells/mm <sup>3</sup> | 6.55      | 1.04       | 0.23            |
| 200 cells/mm <sup>3</sup> | 7.03      | 1.11       | 0.72            |
| 35 to 45                  |           |            |                 |
| 500 cells/mm <sup>3</sup> | 11.62     | 1          | 0               |
| 350 cells/mm <sup>3</sup> | 13.42     | 1.15       | 1.80            |
| 200 cells/mm <sup>3</sup> | 14.44     | 1.24       | 2.81            |
| 45 to 65                  |           |            |                 |
| 500 cells/mm <sup>3</sup> | 19.18     | 1          | 0               |
| 350 cells/mm <sup>3</sup> | 20.79     | 1.17       | 3.26            |
| 200 cells/mm <sup>3</sup> | 28.84     | 1.50       | 9.66            |

Supplemental table 5. Standardized 5-year cumulative incidence of mortality under no intervention and 3 dynamic treatment plans with a 6-month grace period among 3390 patients who entered care at between January 1, 1998 and December 31, 2013 at 8 US clinical sites with censoring after the first 6 and 18 month gaps in care, followed for death up to 10 years

| Treatment plan            | Censor after 6 month gap in care <sup>a</sup> |            |                 | Censor after 18 month gap in care <sup>b</sup> |            |                 |
|---------------------------|-----------------------------------------------|------------|-----------------|------------------------------------------------|------------|-----------------|
|                           | Mortality                                     | Risk ratio | Risk difference | Mortality                                      | Risk ratio | Risk difference |
| All ages                  |                                               |            |                 |                                                |            |                 |
| 500 cells/mm <sup>3</sup> | 5.27                                          | 1          | 0               | 5.19                                           | 1          | 0               |
| 350 cells/mm <sup>3</sup> | 5.64                                          | 1.10       | 0.36            | 5.62                                           | 1.08       | 0.43            |
| 200 cells/mm <sup>3</sup> | 5.79                                          | 1.10       | 0.51            | 6.07                                           | 1.17       | 0.88            |
| 18 to 34                  |                                               |            |                 |                                                |            |                 |
| 500 cells/mm <sup>3</sup> | 1.97                                          | 1          | 0               | 2.20                                           | 1          | 0               |
| 350 cells/mm <sup>3</sup> | 1.89                                          | 0.96       | -0.08           | 2.29                                           | 1.04       | 0.09            |
| 200 cells/mm <sup>3</sup> | 2.10                                          | 1.10       | 0.14            | 2.28                                           | 1.04       | 0.08            |
| 35 to 45                  |                                               |            |                 |                                                |            |                 |
| 500 cells/mm <sup>3</sup> | 4.37                                          | 1          | 0               | 5.65                                           | 1          | 0               |
| 350 cells/mm <sup>3</sup> | 4.87                                          | 1.11       | 0.49            | 6.00                                           | 1.06       | 0.35            |
| 200 cells/mm <sup>3</sup> | 4.38                                          | 1.00       | 0.01            | 6.50                                           | 1.15       | 0.86            |
| 45 to 65                  |                                               |            |                 |                                                |            |                 |
| 500 cells/mm <sup>3</sup> | 12.94                                         | 1          | 0               | 9.88                                           | 1          | 0               |
| 350 cells/mm <sup>3</sup> | 14.08                                         | 1.09       | 1.14            | 11.21                                          | 1.13       | 1.32            |
| 200 cells/mm <sup>3</sup> | 15.13                                         | 1.17       | 2.19            | 12.46                                          | 1.26       | 2.58            |

<sup>a</sup> When censoring was performed after a 6 month gap in care, 82% of the patients were censored by 10 years after study entry (likely due to the more common acceptance of longer visit intervals).

<sup>b</sup> When censoring was performed after an 18 month gap in care, 47% of patients were censored by 10 years after study entry.

Note that mortality estimates, risk ratios, and risk differences in this table are reported for 5-year mortality rather than 10-year mortality as data became sparse when patients were censored after a 6 month gap in care

Supplemental table 6. Percentage of patients who initiated therapy in each CD4 cell count category and median CD4 cell count at therapy initiation by year of study entry among eligible patients *who initiated antiretroviral therapy during the study period* in CNICS.

| Year at study entry | n   | Category                | Percentage in each category | Median CD4 cell count at therapy initiation |
|---------------------|-----|-------------------------|-----------------------------|---------------------------------------------|
| 1998                | 88  |                         |                             | 566                                         |
|                     |     | Under 200               | 9.09                        |                                             |
|                     |     | Between 200 and 350     | 10.23                       |                                             |
|                     |     | Between 350 and 500     | 12.50                       |                                             |
| 1999                | 96  |                         |                             | 513                                         |
|                     |     | CD4 under 200           | 4.17                        |                                             |
|                     |     | CD4 between 200 and 350 | 16.67                       |                                             |
|                     |     | CD4 between 350 and 500 | 26.04                       |                                             |
| 2000                | 83  |                         |                             | 496                                         |
|                     |     | Under 200               | 12.05                       |                                             |
|                     |     | Between 200 and 350     | 24.10                       |                                             |
|                     |     | Between 350 and 500     | 14.46                       |                                             |
| 2001                | 103 |                         |                             | 407                                         |
|                     |     | Under 200               | 10.68                       |                                             |
|                     |     | Between 200 and 350     | 28.16                       |                                             |
|                     |     | Between 350 and 500     | 27.18                       |                                             |
| 2002                | 80  |                         |                             | 397                                         |
|                     |     | Under 200               | 17.50                       |                                             |
|                     |     | Between 200 and 350     | 25.00                       |                                             |
|                     |     | Between 350 and 500     | 18.75                       |                                             |
| 2003                | 113 |                         |                             | 409                                         |
|                     |     | Under 200               | 11.50                       |                                             |
|                     |     | Between 200 and 350     | 29.20                       |                                             |
|                     |     | Between 350 and 500     | 21.24                       |                                             |
| 2004                | 91  |                         |                             | 394                                         |
|                     |     | Under 200               | 8.79                        |                                             |
|                     |     | Between 200 and 350     | 30.77                       |                                             |
|                     |     | Between 350 and 500     | 25.27                       |                                             |
| 2005                | 104 |                         |                             | 373                                         |
|                     |     | Under 200               | 5.77                        |                                             |
|                     |     | Between 200 and 350     | 34.62                       |                                             |
|                     |     | Between 350 and 500     | 27.88                       |                                             |
| 2006                | 111 |                         |                             | 442                                         |
|                     |     | Under 200               | 5.41                        |                                             |
|                     |     | Between 200 and 350     | 22.52                       |                                             |
|                     |     | Between 350 and 500     | 29.73                       |                                             |
| 2007                | 131 |                         |                             | 486                                         |



---

|      |     |                     |       |     |
|------|-----|---------------------|-------|-----|
|      |     | Under 200           | 5.34  |     |
|      |     | Between 200 and 350 | 15.27 |     |
|      |     | Between 350 and 500 | 34.35 |     |
| 2008 | 150 |                     |       | 528 |
|      |     | Under 200           | 4.00  |     |
|      |     | Between 200 and 350 | 14.00 |     |
|      |     | Between 350 and 500 | 26.67 |     |
| 2009 | 157 |                     |       | 552 |
|      |     | Under 200           | 0.64  |     |
|      |     | Between 200 and 350 | 12.74 |     |
|      |     | Between 350 and 500 | 21.66 |     |
| 2010 | 177 |                     |       | 594 |
|      |     | Under 200           | 1.13  |     |
|      |     | Between 200 and 350 | 3.39  |     |
|      |     | Between 350 and 500 | 18.08 |     |
| 2011 | 143 |                     |       | 610 |
|      |     | Under 200           | 0.00  |     |
|      |     | Between 200 and 350 | 4.90  |     |
|      |     | Between 350 and 500 | 13.29 |     |
| 2012 | 148 |                     |       | 641 |
|      |     | Under 200           | 0.00  |     |
|      |     | Between 200 and 350 | 2.03  |     |
|      |     | Between 350 and 500 | 5.41  |     |
| 2013 | 43  |                     |       | 667 |
|      |     | Under 200           | 0.00  |     |
|      |     | Between 200 and 350 | 0.00  |     |
|      |     | Between 350 and 500 | 2.33  |     |

---

Supplemental table 7. Number and percentage of patients initiating 4 classes of antiretroviral therapy regimens by age group at study entry in CNICS between 1998 and 2013.

| Regimen                                         | Ages 18 – 34 |    | Ages 35 – 44 |    | Ages 45 – 65 |    |
|-------------------------------------------------|--------------|----|--------------|----|--------------|----|
|                                                 | n            | %  | n            | %  | n            | %  |
| Did not start therapy                           | 776          | 47 | 538          | 47 | 323          | 44 |
| Integrase inhibitors                            | 39           | 2  | 46           | 4  | 36           | 5  |
| Non-nucleoside reverse transcriptase inhibitors | 514          | 31 | 316          | 27 | 218          | 30 |
| Protease inhibitors                             | 284          | 17 | 225          | 19 | 134          | 18 |
| Nucleoside reverse transcriptase inhibitors     | 22           | 1  | 27           | 2  | 17           | 2  |

Supplemental table 8. Number and proportion of patients lost to follow-up over the 10-year study period by age group

| Age group         | n   | %  |
|-------------------|-----|----|
| Between 18 and 34 | 970 | 59 |
| Between 35 and 44 | 637 | 55 |
| Between 45 and 65 | 304 | 41 |

Supplemental table 9. Standardized 10-year cumulative incidence of mortality under no intervention and 3 dynamic treatment plans with a 6-month grace period among 3532 patients who entered care at between January 1, 1998 and December 31, 2013 at 8 US clinical sites *stratified by year at study entry*, followed for death up to 10 years.

| Treatment plan            | Mortality | Risk ratio | Risk difference |
|---------------------------|-----------|------------|-----------------|
| No intervention           | 12.60     |            |                 |
| All years                 |           |            |                 |
| 500 cells/mm <sup>3</sup> | 10.80     | 1          | 0               |
| 350 cells/mm <sup>3</sup> | 11.66     | 1.08       | 0.87            |
| 200 cells/mm <sup>3</sup> | 13.51     | 1.25       | 2.71            |
| 1998 - 2002               |           |            |                 |
| 500 cells/mm <sup>3</sup> | 12.75     | 1          | 0               |
| 350 cells/mm <sup>3</sup> | 13.32     | 1.05       | 0.57            |
| 200 cells/mm <sup>3</sup> | 15.42     | 1.21       | 2.67            |
| 2003 - 2007               |           |            |                 |
| 500 cells/mm <sup>3</sup> | 11.55     | 1          | 0               |
| 350 cells/mm <sup>3</sup> | 13.23     | 1.15       | 1.68            |
| 200 cells/mm <sup>3</sup> | 14.24     | 1.23       | 2.69            |
| 2008 to 2013              |           |            |                 |
| 500 cells/mm <sup>3</sup> | 6.02      | 1          | 0               |
| 350 cells/mm <sup>3</sup> | 6.60      | 1.10       | 0.58            |
| 200 cells/mm <sup>3</sup> | 9.42      | 1.56       | 3.40            |

Supplemental table 10. Crude 5-year cumulative incidence of mortality by age and CD4 cell count at therapy initiation 1811 patients who initiated therapy at between January 1, 1998 and December 31, 2013 at 8 US clinical sites, followed from therapy initiation to death up to 5 years <sup>a</sup>.

| Age group | CD4 cell count at ART | 5-year mortality | Risk ratio | Risk difference |
|-----------|-----------------------|------------------|------------|-----------------|
| 18 – 34   | 0 – 200               | 6.9%             | 3.7        | 5.1             |
|           | 201 – 350             | 5.2%             | 2.8        | 2.7             |
|           | 351 – 500             | 4.6%             | 2.5        | 3.3             |
|           | >500                  | 1.8%             | 1          | 0               |
| 35 – 44   | 0 – 200               | 17.5%            | 2.1        | 9.4             |
|           | 201 – 350             | 6.0%             | 0.7        | -2.2            |
|           | 351 – 500             | 5.9%             | 0.7        | -2.3            |
|           | >500                  | 8.2%             | 1          | 0               |
| 45 – 65   | 0 – 200               | 24.1%            | 5.8        | 20.0            |
|           | 201 – 350             | 8.9%             | 2.1        | 4.7             |
|           | 351 – 500             | 12.2%            | 2.9        | 8.1             |
|           | >500                  | 4.2%             | 1          | 0               |

<sup>a</sup>These crude results may be subject to lead time bias in addition to confounding.

Supplementary figure 1: Observed cumulative incidence of mortality (solid line) and cumulative incidence of mortality estimated under no intervention (dashed line) among 3532 patients who entered care at between January 1, 1998 and December 31, 2013 at 8 US clinical sites with a CD4 cell count over 500 cells/mm<sup>3</sup>, followed for death up to 10 years

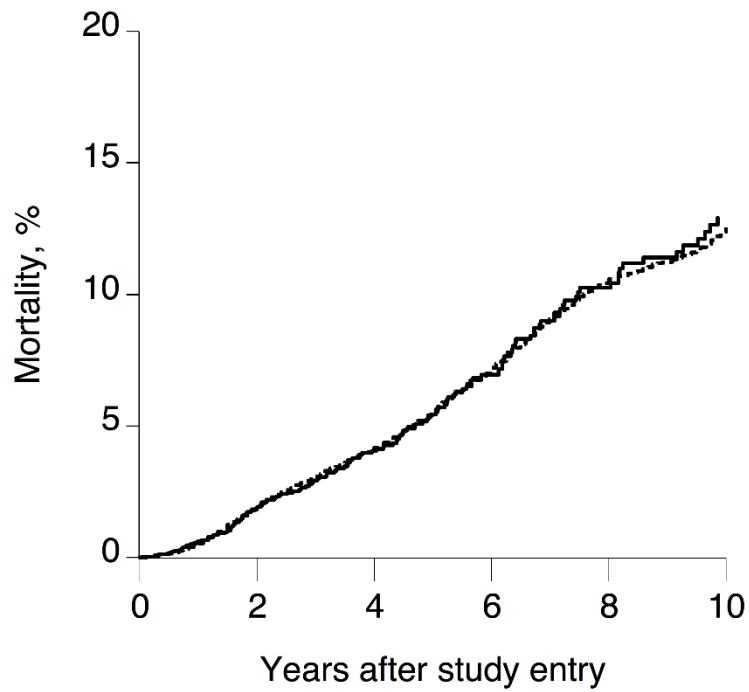

Supplementary figure 2. Cumulative incidence of combination antiretroviral therapy initiation by time since enrollment in CNICS among patients with HIV between 1998 and 2013

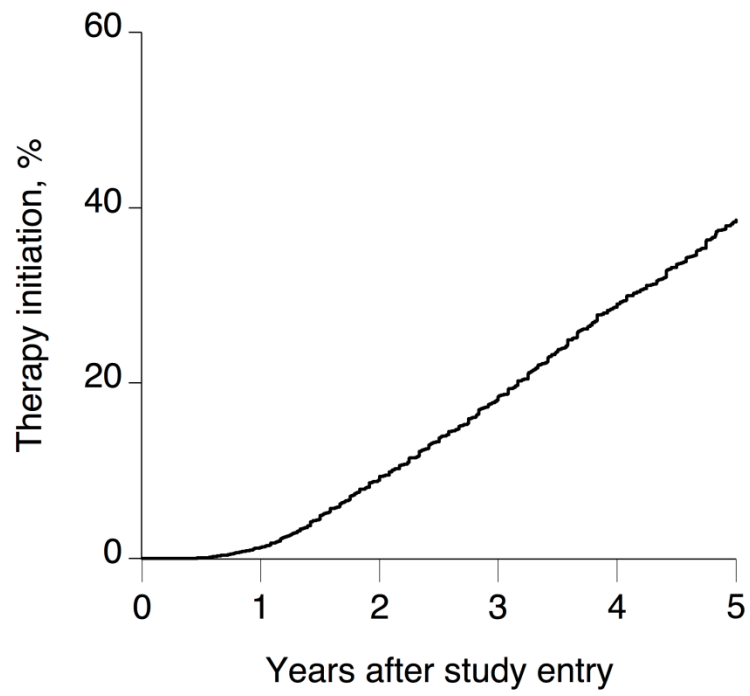

Supplement: supp_civ463_civ463supp.pdf [file supp_civ463_civ463supp.pdf]
